# Supplementary material
Source: publisher figshare collection journal article supplement (https://acs.figshare.com/ndownloader/files/3987709)

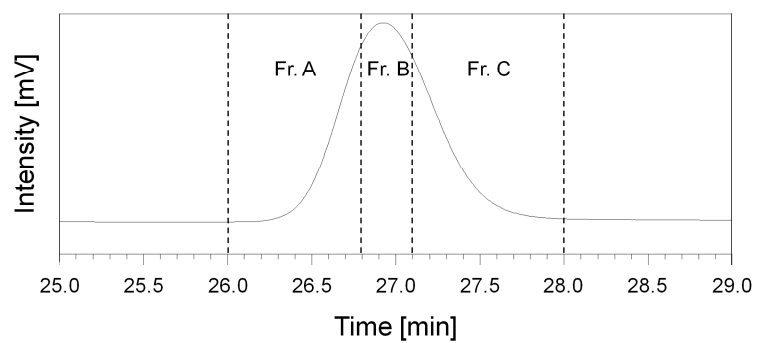

**Supporting Information 1.** HPLC profile of 2-phenylethyl  $\beta$ -primeveroside and fractionation. For conditions, see text.

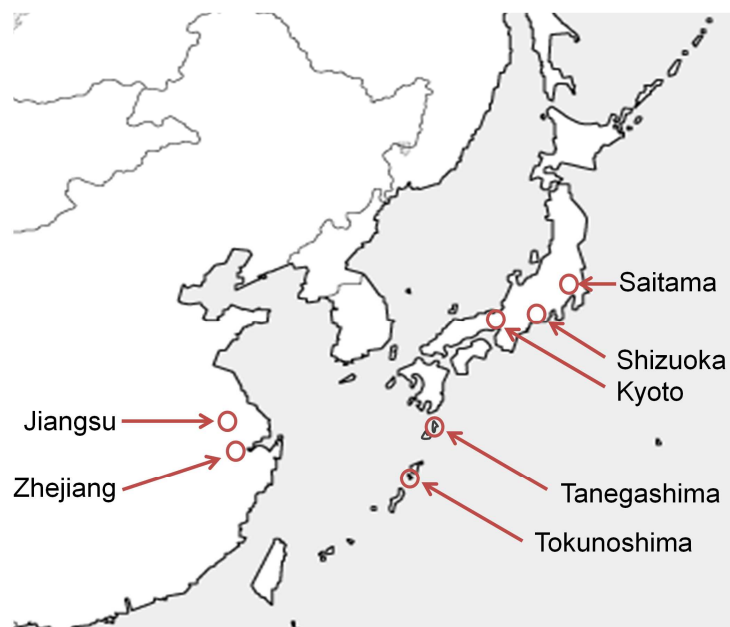

**Supporting Information 2.** Seven green tea production areas.

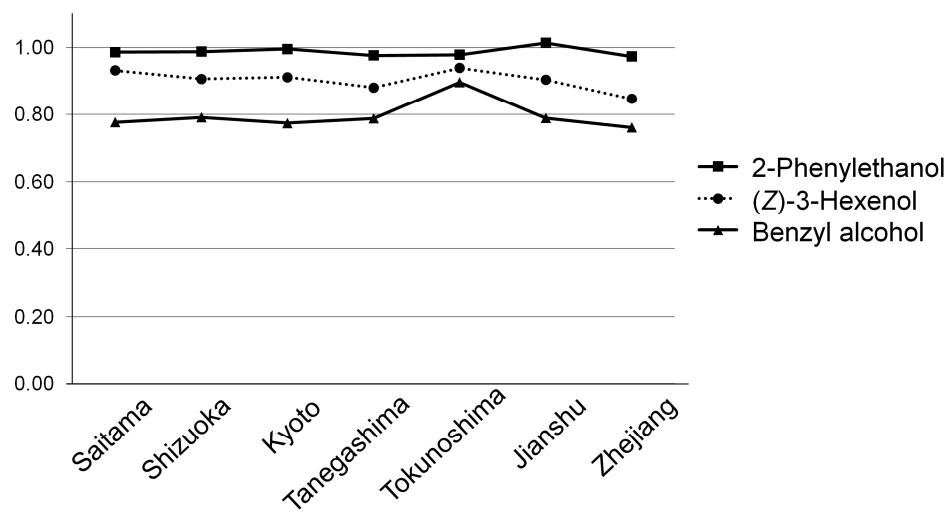

**Supporting Information 3.** The values of  $[\delta^{13}\text{C of Bulk}] / [\delta^{13}\text{C of volatile compound}]$  in several areas.

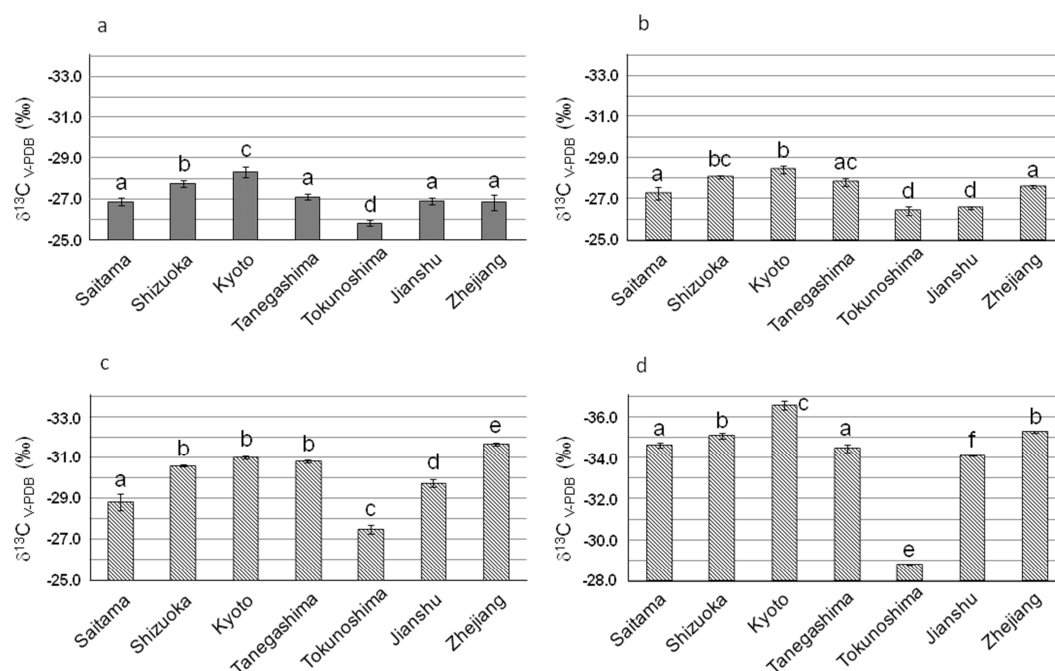

Supplement: Supplementary file 1 [file 3987709]
